# Supplementary material
Source: MDPI journal article supplement (https://www.mdpi.com/2079-6412/11/5/596)
Supplement: s1 [file s1]

# Supplementary Materials: Mesoporous $\text{CoO}_x/\text{C}$ Nanocomposites Functionalized Electrochemical Sensor for Rapid and Continuous Detection of Nitrite

Xuhua Dong <sup>1</sup>, Siqi Xie <sup>1</sup>, Jingyang Zhu <sup>1</sup>, Haiquan Liu <sup>1</sup>, Yong Zhao <sup>1</sup>, Tianjun Ni <sup>2,\*</sup>, Long Wu <sup>3,\*</sup> and Yongheng Zhu <sup>1,\*</sup>

<sup>1</sup> Laboratory of Quality & Safety Risk Assessment for Aquatic Products on Storage and Preservation (Shanghai), College of Food Science and Technology, Ministry of Agriculture and and Shanghai Engineering Research Center of Aquatic-Product Processing & Preservation Shanghai Ocean University, Shanghai 201306, China; xhdong5939@126.com (X.D.); 13651676832@163.com (S.X.); 15837688323@163.com (J.Z.); hqliu@shou.edu.cn (H.L.); yzhao@shou.edu.cn (Y.Z.)

<sup>2</sup> School of Basic Medicine, Xinxiang Medical University, Xinxiang 453003, China

<sup>3</sup> National “111” Center for Cellular Regulation and Molecular Pharmaceutics, Key Laboratory of Fermentation Engineering (Ministry of Education), College of Bioengineering and Food, Hubei University of Technology, Wuhan 430068, China

\* Correspondence: tjni@xxmu.edu.cn (T.N.); longquan.good@163.com (L.W.); yh-zhu@shou.edu.cn (Y.Z.); Tel.: +86-0373-3831859 (T.N.); +86-0898-66198861(L.W.); +86-021-61900354 (Y.Z.)

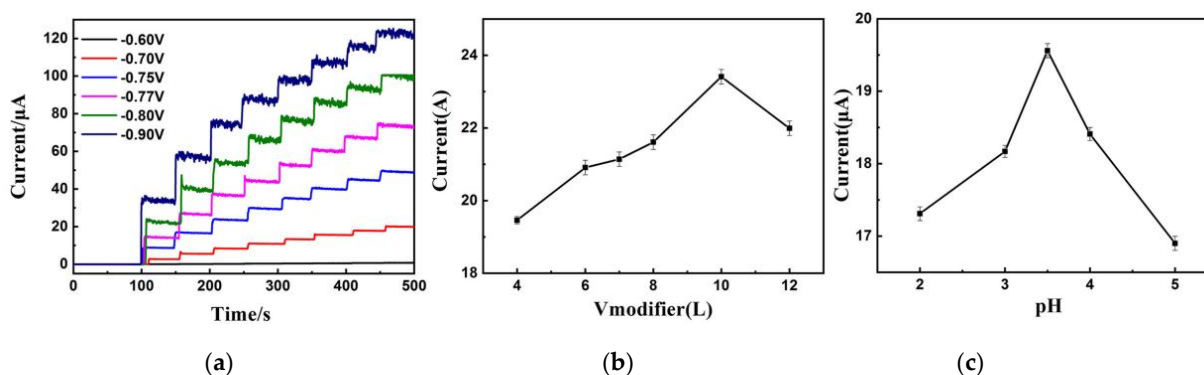

**Figure S1.** Current response of  $\text{CoO}_x/\text{C}@GCE$  at different (a) applied potentials; (b) volume of modifier; (c) pH value of PBS.

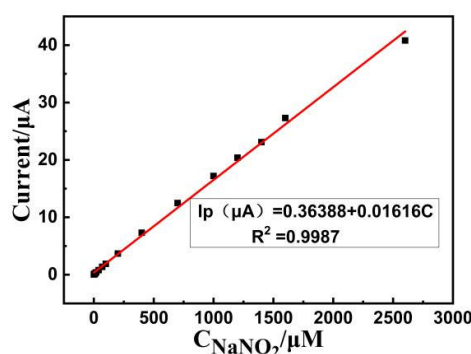

**Figure S2.** Calibrated curve between the amperometric responses and nitrite concentrations from 0.2 to 2500  $\mu\text{M}$ .
